# Supplementary material for: Genotoxic and Cytotoxic Properties of Zinc Oxide Nanoparticles Phyto-Fabricated from the Obscure Morning Glory Plant Ipomoea obscura (L.) Ker Gawl
Source: PubMed Central journal article supplement (PMC7915295; doi:10.3390/molecules26040891), 2021-02-08
Supplement: molecules-26-00891-s001.pdf [file molecules-26-00891-s001.pdf]

**Supplementary Table 1:** Estimated crystallite size of phyto-fabricated ZnO-NPs from *I. obscura* leaf extract

|                               | <b>2θ (deg.)</b> | <b>(hkl)</b> | <b>FWHM</b> | <b>Crystalline Size (nm)</b> | <b>Average Crystalline Size (nm)</b> |
|-------------------------------|------------------|--------------|-------------|------------------------------|--------------------------------------|
| <b>Biosynthesized ZnO-NPs</b> | 31.65            | (100)        | 0.3459      | 24.95                        | 24.26                                |
|                               | 34.47            | (002)        | 0.3527      | 24.65                        |                                      |
|                               | 36.17            | (101)        | 0.366       | 23.87                        |                                      |
|                               | 47.43            | (102)        | 0.397       | 22.85                        |                                      |
|                               | 56.48            | (110)        | 0.4201      | 22.44                        |                                      |
|                               | 62.83            | (103)        | 0.3475      | 28.00                        |                                      |
|                               | 66.35            | (200)        | 0.3838      | 25.85                        |                                      |
|                               | 67.86            | (112)        | 0.3745      | 26.72                        |                                      |
|                               | 68.98            | (201)        | 0.5302      | 19.00                        |                                      |

**Supplementary Table 2:** FT-IR spectra with possible assignments of phyto-fabricated ZnO-NPs and *I. obscura* leaf extract

| <b>Frequency (cm<sup>-1</sup>)</b>    | <b>Possible assignment</b> | <b>Functional Group</b> |
|---------------------------------------|----------------------------|-------------------------|
| <b><i>Ipomoea obscura</i> extract</b> |                            |                         |
| 3350.35                               | O-H stretch                | Alcohol/ Phenol         |
| 1630                                  | N-H bend                   | Primary amines          |
| 1401.42                               | C-C bend                   | Aromatic carbon         |
| 1015.09                               | C-N bend                   | Aliphatic amine         |
| 674.88                                | - C=C – H stretch          | Alkyne                  |
| <b>Phyto-fabricated ZnO-NPs</b>       |                            |                         |
| 496.94                                | Zn-O                       | Zinc oxide              |

**Supplementary Table 3: Genotoxicity of phyto-fabricated ZnO-NPs from *I. obscura* leaf extract**

| <b>Treatments<br/>(mg mL<sup>-1</sup>)</b> | <b>Mitotic Index<br/>(%)</b> | <b>Dividing Cells<br/>(%)</b> | <b>Mitotic Inhibition<br/>(%)</b> |
|--------------------------------------------|------------------------------|-------------------------------|-----------------------------------|
| 0.2                                        | 66.08 ± 1.19 <sup>a</sup>    | 44.66 ± 0.99 <sup>a</sup>     | 55.30 ± 1.02 <sup>e</sup>         |
| 0.4                                        | 55.33 ± 1.02 <sup>b</sup>    | 42.70 ± 1.44 <sup>a</sup>     | 57.29 ± 1.44 <sup>e</sup>         |
| 0.6                                        | 47.68 ± 0.60 <sup>c</sup>    | 34.96 ± 0.93 <sup>b</sup>     | 65.03 ± 0.93 <sup>d</sup>         |
| 0.8                                        | 41.17 ± 0.86 <sup>d</sup>    | 30.83 ± 0.89 <sup>c</sup>     | 69.17 ± 0.89 <sup>c</sup>         |
| 1.0                                        | 39.49 ± 0.71 <sup>d</sup>    | 24.68 ± 1.18 <sup>d</sup>     | 75.15 ± 1.02 <sup>b</sup>         |
| Methotrexate                               | 15.89 ± 0.45 <sup>e</sup>    | 18.43 ± 0.56 <sup>e</sup>     | 81.68 ± 0.80 <sup>a</sup>         |

Values are means of three independent replicates (n = 3) and ± indicates standard error. Means followed by the same letter(s) within the same column are not significantly ( $p \leq 0.05$ ) different according to Tukey's HSD.
